# Supplementary material
Source: PubMed Central journal article supplement (PMC6644519)
Supplement: ao8b01493_si_001.pdf [file ao8b01493_si_001.pdf]

**Supporting information for:**  
**Thermodynamics of the binding of lysozyme  
to a dendritic polyelectrolyte: Electrostatics  
vs. hydration**

Qidi Ran,<sup>†,‡,¶</sup> Xiao Xu,<sup>§</sup> Joachim Dzubiella,<sup>||,‡,¶</sup> Rainer Haag,<sup>\*,†,¶</sup> and Matthias  
Ballauff<sup>\*,‡,¶,⊥</sup>

<sup>†</sup>Institute of Chemistry and Biochemistry, Freie Universität Berlin, Takustr. 3, 14195 Berlin,  
Germany

<sup>‡</sup>Institute of Soft Matter and Functional Materials, Helmholtz-Zentrum Berlin,  
Hahn-Meitner-Platz 1, 14109 Berlin, Germany

<sup>¶</sup>Multifunctional Biomaterials for Medicine, Helmholtz Virtual Institute, Kantstr. 55, 14513  
Teltow-Seehof, Germany

<sup>§</sup>School of Chemical Engineering, Nanjing University of Science and Technology, 200 Xiao Ling  
Wei, 210094 Nanjing, P. R. China

<sup>||</sup>Physikalisches Institut, Albert-Ludwigs-Universität, Hermann-Herder-Str. 3, 79104 Freiburg,  
Germany

<sup>⊥</sup>Institut für Physik, Humboldt-Universität zu Berlin, Newtonstr. 15, 12489 Berlin, Germany

E-mail: haag@chemie.fu-berlin.de; matthias.ballauff@helmholtz-berlin.de

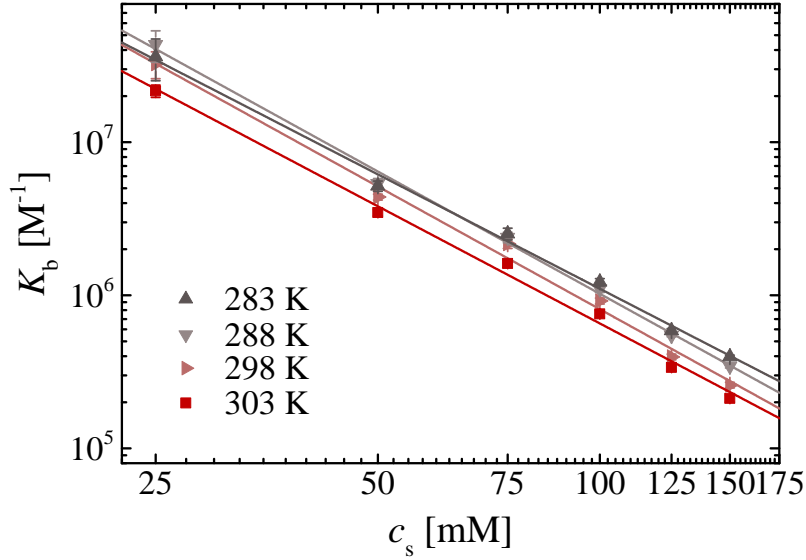

**Figure S1:** The salt dependence of binding constant for dPGS-Lys interaction at different temperatures. The number of released counterions  $\Delta N_{ci}$  is  $2.5 \pm 0.1$ ,  $2.7 \pm 0.1$ ,  $2.7 \pm 0.1$ , and  $2.5 \pm 0.1$  for 283 K, 288 K, 298 K, and 303 K, respectively.

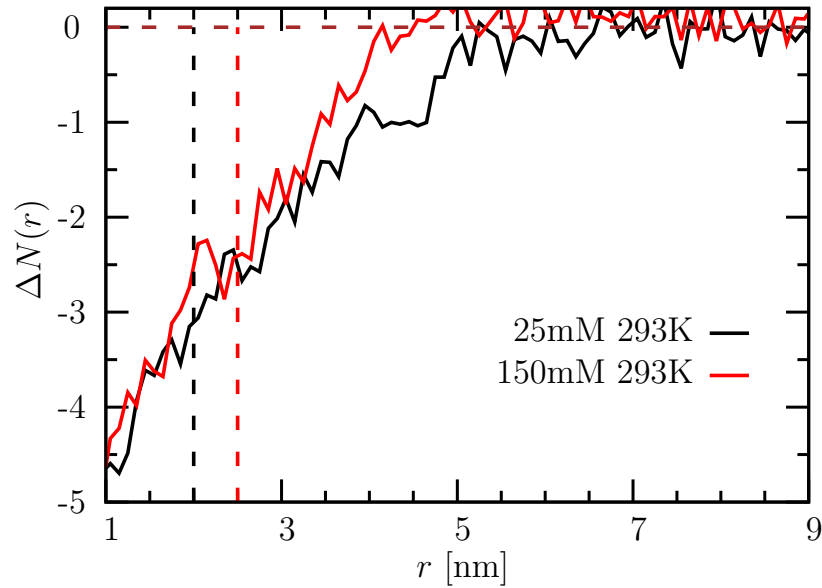

**Figure S2:** The decrease of condensed counterions  $\Delta N(r)$  on the dPGS surface upon binding with lysozyme according to computer simulations.  $r$  denotes the center-of-mass distance between dPGS and the first bound lysozyme. The number of released counterions can be read off at the distance  $r_b$  found with the bound state (dashed lines).  $\Delta N(r_b)$  is 3.0 at  $r_b = 2.0$  nm, and 2.5 at  $r_b = 2.5$  nm.

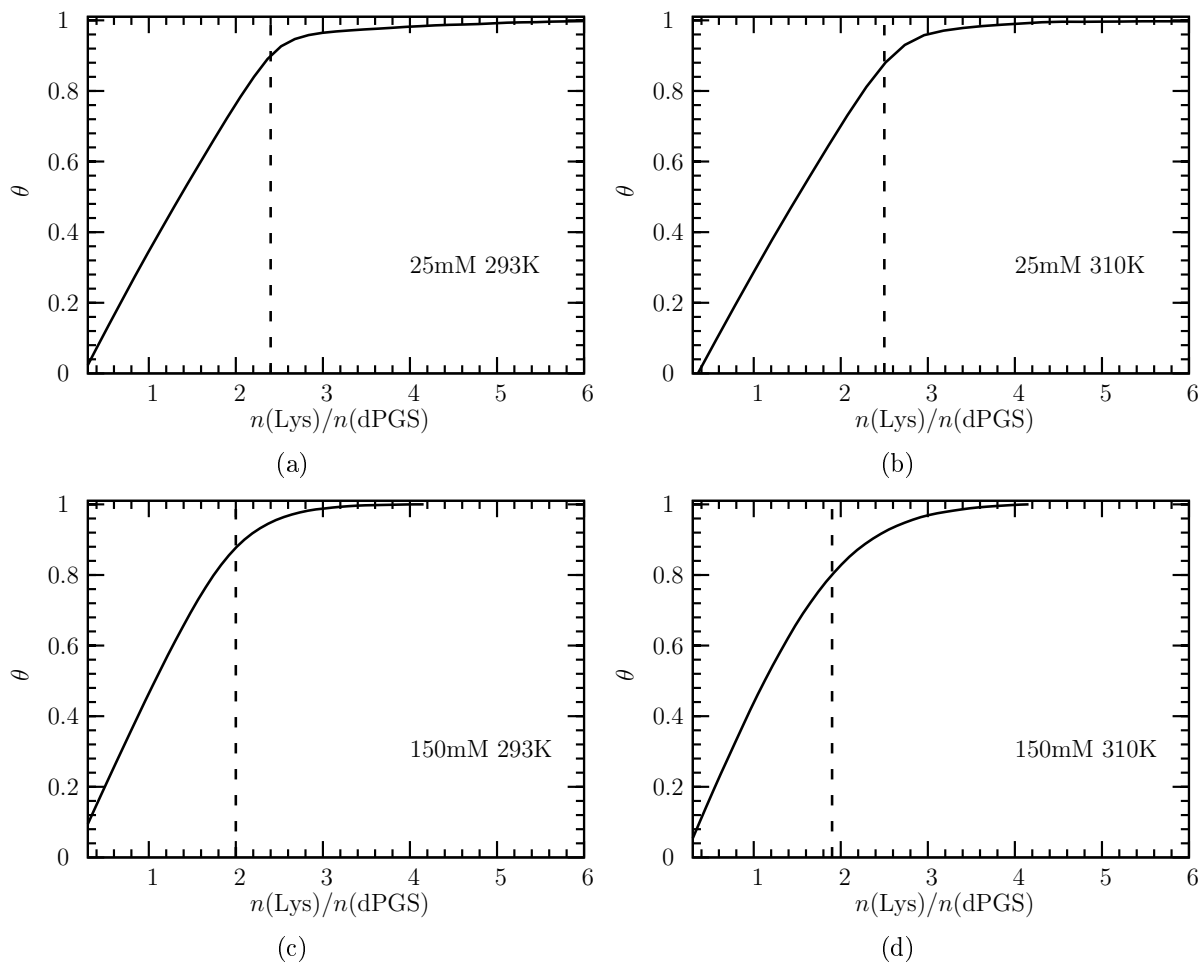

**Figure S3:** The protein coverage  $\theta$  as a function of the molar ratio  $n(\text{Lys})/n(\text{dPGS})$  in ITC measurements at different ionic strengths and temperatures.  $\theta$  are plotted according to previous deviations (see the SI in ref.<sup>S1</sup>). Each dashed line denotes the inflection point (binding number  $N$ ) in the respective ITC isotherm. The intersection points with  $\theta$  refer to the coverage  $\theta^*$  at the inflection points.

## References

- (S1) Xu, X.; Ran, Q.; Dey, P.; Nikam, R.; Haag, R.; Ballauff, M.; Dzubiella, J. Counterion-release entropy governs the inhibition of serum proteins by polyelectrolyte drugs. *Biomacromolecules* **2018**, *19*, 409–416.
